# Supplementary material
Source: publisher figshare collection journal article supplement (https://sage.figshare.com/ndownloader/files/17566256)
Supplement: Supplementary file 1 [file 17566256]

## APPENDIX A: FACTOR ANALYSES

**Table A1. Pattern Matrices for Factor Analyses with Promax Rotation**

| <b>Study 1 – Southern Agency</b>                                                                                        |  | Factor |       |
|-------------------------------------------------------------------------------------------------------------------------|--|--------|-------|
| Item                                                                                                                    |  | 1      | 2     |
| <i>Citizen Animus</i>                                                                                                   |  |        |       |
| People often disrespect and insult the police.                                                                          |  | .731   |       |
| People are normally polite when dealing with the police.*                                                               |  | .495   |       |
| People treat police officers with dignity.*                                                                             |  | .564   |       |
| People treat the police worse than they treat other government employees.                                               |  | .666   |       |
| People treat police officers unfairly.                                                                                  |  | .762   |       |
| People normally listen to the police before jumping to conclusions in incidents.*                                       |  | .457   |       |
| People will ignore or walk away from the police when officers try to explain a situation.                               |  | .560   |       |
| <i>Audience Legitimacy</i>                                                                                              |  |        |       |
| Most civilians feel an obligation to obey police officers.                                                              |  |        | .852  |
| Most civilians believe they should do what the police say, even if they disagree.                                       |  |        | .849  |
| Most civilians feel [this agency] can be trusted to make decisions that are right for the people in their neighborhood. |  |        | .727  |
| Eigenvalue                                                                                                              |  | 3.721  | 1.197 |
| <b>Study 2 – National Sample</b>                                                                                        |  | Factor |       |

| Item                                                                                      | 1     | 2     |
|-------------------------------------------------------------------------------------------|-------|-------|
| <hr/> <i>Citizen Animus</i>                                                               |       |       |
| People often disrespect and insult the police.                                            | .667  |       |
| People are normally polite when dealing with the police.*                                 | .531  |       |
| People treat police officers with dignity.*                                               | .580  |       |
| People treat the police worse than they treat other government employees.                 | .657  |       |
| People treat police officers unfairly.                                                    | .750  |       |
| People normally listen to the police before jumping to conclusions in incidents.*         | .493  |       |
| People will ignore or walk away from the police when officers try to explain a situation. | .568  |       |
| <i>Audience Legitimacy [Most residents believe the police...]</i>                         |       |       |
| ...Are corrupt.*                                                                          |       | .453  |
| ...Use rules and procedures that are fair to everyone.                                    |       | .503  |
| ...Clearly explain the reasons for their actions.                                         |       | .630  |
| ...Treat people with respect.                                                             |       | .770  |
| ...Are biased against them.*                                                              |       | .567  |
| ...Do a good job tackling crime in the community.                                         |       | .573  |
| ...Represent their values.                                                                |       | .720  |
| Eigenvalue                                                                                | 4.068 | 1.365 |

---

\* Item reverse coded. Only factor loadings  $\geq .30$  are displayed.

## APPENDIX B: CORRELATION MATRICES

**Table B1. Correlation Matrix for Study 1 Variables**

| Variable                             | Y     | X <sub>1</sub> | X <sub>2</sub> | X <sub>3</sub> | X <sub>4</sub> | X <sub>5</sub> | X <sub>6</sub> | X <sub>7</sub> | X <sub>8</sub> | X <sub>9</sub> |
|--------------------------------------|-------|----------------|----------------|----------------|----------------|----------------|----------------|----------------|----------------|----------------|
| Y Audience legitimacy                | 1.00  |                |                |                |                |                |                |                |                |                |
| X <sub>1</sub> Recently Disrespected | -.33* | 1.00           |                |                |                |                |                |                |                |                |
| X <sub>2</sub> Citizen Animus        | -.42* | .46*           | 1.00           |                |                |                |                |                |                |                |
| X <sub>3</sub> Perceived Crime Trend | -.15* | .07            | .20*           | 1.00           |                |                |                |                |                |                |
| X <sub>4</sub> Male                  | -.01  | .13*           | -.01           | -.02           | 1.00           |                |                |                |                |                |
| X <sub>5</sub> White                 | .03   | .00            | .00            | -.03           | -.01           | 1.00           |                |                |                |                |
| X <sub>6</sub> Four-year Degree      | .01   | .02            | -.03           | -.05           | -.16*          | -.01           | 1.00           |                |                |                |
| X <sub>7</sub> Years of Experience   | .19*  | -.46*          | -.15*          | .05            | .01            | .12*           | -.18*          | 1.00           |                |                |
| X <sub>8</sub> Front-line Supervisor | .11*  | -.24*          | -.10*          | .10*           | -.01           | .14*           | -.04           | .37*           | 1.00           |                |
| X <sub>9</sub> Upper Management      | .16*  | -.34*          | -.15*          | -.08           | -.03           | .05*           | .05            | .37*           | -.28*          | 1.00           |

*NOTE:* Matrix constructed using listwise deleted data (N = 425). Entries are Pearson's correlation coefficients.

\*  $p < .05$

**Table B2. Correlation Matrix for Study 2 Variables**

| Variable        |                                 | Y     | X <sub>1</sub> | X <sub>2</sub> | X <sub>3</sub> | X <sub>4</sub> | X <sub>5</sub> | X <sub>6</sub> | X <sub>7</sub> | X <sub>8</sub> | X <sub>9</sub> | X <sub>10</sub> | X <sub>11</sub> | X <sub>12</sub> | X <sub>13</sub> | X <sub>14</sub> | X <sub>15</sub> | X <sub>16</sub> | X <sub>17</sub> | X <sub>18</sub> | X <sub>19</sub> |
|-----------------|---------------------------------|-------|----------------|----------------|----------------|----------------|----------------|----------------|----------------|----------------|----------------|-----------------|-----------------|-----------------|-----------------|-----------------|-----------------|-----------------|-----------------|-----------------|-----------------|
| Y               | Audience Legitimacy             | 1.00  |                |                |                |                |                |                |                |                |                |                 |                 |                 |                 |                 |                 |                 |                 |                 |                 |
| X <sub>1</sub>  | Citizen Animus                  | -.45* | 1.00           |                |                |                |                |                |                |                |                |                 |                 |                 |                 |                 |                 |                 |                 |                 |                 |
| X <sub>2</sub>  | Hostile Local Media             | -.25* | .38*           | 1.00           |                |                |                |                |                |                |                |                 |                 |                 |                 |                 |                 |                 |                 |                 |                 |
| X <sub>3</sub>  | Hostile National Media          | -.03  | .17*           | .25*           | 1.00           |                |                |                |                |                |                |                 |                 |                 |                 |                 |                 |                 |                 |                 |                 |
| X <sub>4</sub>  | Violent Crime Rate <sup>a</sup> | -.17* | -.03           | .00            | .01            | 1.00           |                |                |                |                |                |                 |                 |                 |                 |                 |                 |                 |                 |                 |                 |
| X <sub>5</sub>  | % Black <sup>a</sup>            | -.03  | .04            | .10            | .04            | .26*           | 1.00           |                |                |                |                |                 |                 |                 |                 |                 |                 |                 |                 |                 |                 |
| X <sub>6</sub>  | % Hispanic <sup>a</sup>         | -.05  | -.12           | .10            | .10            | .26*           | .20*           | 1.00           |                |                |                |                 |                 |                 |                 |                 |                 |                 |                 |                 |                 |
| X <sub>7</sub>  | Change %Black <sup>a</sup>      | .09   | .00            | .04            | .04            | -.01           | .37*           | -.02           | 1.00           |                |                |                 |                 |                 |                 |                 |                 |                 |                 |                 |                 |
| X <sub>8</sub>  | Change %Hispanic <sup>a</sup>   | -.04  | -.15           | .00            | .05            | .15*           | .19*           | .58*           | .01            | 1.00           |                |                 |                 |                 |                 |                 |                 |                 |                 |                 |                 |
| X <sub>9</sub>  | Chief                           | .21*  | -.06           | -.17*          | -.16*          | -.10           | -.24*          | -.10           | -.05           | -.09           | 1.00           |                 |                 |                 |                 |                 |                 |                 |                 |                 |                 |
| X <sub>10</sub> | Years of Experience             | .20*  | -.24*          | -.03           | .01            | .11            | .02            | .07            | .18*           | .10            | .28*           | 1.00            |                 |                 |                 |                 |                 |                 |                 |                 |                 |
| X <sub>11</sub> | Master's Degree                 | .06   | -.08           | .13            | -.05           | .04            | .14*           | .20*           | .00            | .02            | .10*           | .26*            | 1.00            |                 |                 |                 |                 |                 |                 |                 |                 |
| X <sub>12</sub> | Large Agency                    | -.06* | -.03           | .07*           | -.02           | .17*           | .22*           | .18*           | -.03           | .12*           | -.26*          | -.01            | .12*            | 1.00            |                 |                 |                 |                 |                 |                 |                 |
| X <sub>13</sub> | White Male                      | -.02  | -.04           | -.10           | .06            | -.05           | -.06           | -.12           | -.02           | -.03           | .09            | .19*            | .08             | -.08*           | 1.00            |                 |                 |                 |                 |                 |                 |
| X <sub>14</sub> | Northeast                       | -.13  | .13            | .02            | .04            | -.07           | -.14*          | -.29*          | -.07           | -.11           | -.09           | .09             | .01             | -.09*           | .16*            | 1.00            |                 |                 |                 |                 |                 |
| X <sub>15</sub> | Midwest                         | .04   | -.02           | .02            | -.11           | -.03           | -.08           | -.13           | .13            | -.02           | .10            | .03             | -.01            | -.05*           | .06             | -.42*           | 1.00            |                 |                 |                 |                 |
| X <sub>16</sub> | West                            | .03   | -.15*          | -.04           | .05            | .04            | -.25*          | .40*           | -.10           | .02            | .07            | .02             | .03             | .06             | -.16            | -.29*           | -.32*           | 1.00            |                 |                 |                 |
| X <sub>17</sub> | Population size <sup>a</sup>    | -.09  | -.21*          | .07            | -.03           | .33*           | .37*           | .40*           | .04            | .33*           | -.23*          | .26*            | .31*            | .55*            | -.01            | -.09            | -.01            | .13*            | 1.00            |                 |                 |
| X <sub>18</sub> | Unemployment Rate <sup>a</sup>  | -.15  | .03            | -.03           | -.16*          | .40*           | .28*           | .28*           | .03            | .10            | -.10           | -.02            | .08             | .07*            | -.09            | -.06            | -.11            | .12*            | .16             | 1.00            |                 |
| X <sub>19</sub> | % Trump Voters                  | -.04  | .17*           | -.13*          | .03            | -.09           | -.18*          | -.25*          | -.14*          | -.13           | .22*           | -.14            | -.25*           | -.17*           | .09             | -.04            | .00             | -.26*           | -.36*           | -.04            | 1.00            |

*NOTE:* Matrix constructed using listwise deleted data (N = 541). Entries are Pearson's correlation coefficients (weighted to account for sampling design using "corr\_svy" command in Stata 15).

<sup>a</sup> Natural log transformation.

\*  $p < .05$

# APPENDIX C: SUPPLEMENTAL ANALYSES

**Table C1. Study 1: Comparison of Observed Results to Simulated Results wherein Nonrespondents Were Assumed to Have Differed Substantially from Respondents on Perceived Audience Legitimacy**

| Variable                   | Simulated Data             |        |                                      |        |                                      |        |
|----------------------------|----------------------------|--------|--------------------------------------|--------|--------------------------------------|--------|
|                            | Observed Data <sup>a</sup> |        | Negative Bias Threshold <sup>b</sup> |        | Positive Bias Threshold <sup>c</sup> |        |
|                            | <i>b</i>                   | SE     | <i>b</i>                             | SE     | <i>b</i>                             | SE     |
| Recently Disrespected      | -.053                      | (.032) | -.017                                | (.024) | -.048*                               | (.024) |
| Citizen Animus             | -.394***                   | (.057) | -.264***                             | (.044) | -.261***                             | (.044) |
| Perceived Crime Trend      | -.096*                     | (.042) | -.069*                               | (.033) | -.047                                | (.033) |
| Male                       | .075                       | (.123) | .057                                 | (.098) | .057                                 | (.095) |
| White                      | .017                       | (.075) | .016                                 | (.061) | .016                                 | (.060) |
| Four-year Degree           | .028                       | (.067) | .021                                 | (.059) | .020                                 | (.058) |
| Experience                 | .005                       | (.005) | .004                                 | (.004) | .004                                 | (.005) |
| Police Officer (Reference) | —                          |        | —                                    |        | —                                    |        |
| Front-line Supervisor      | .114                       | (.082) | .096                                 | (.074) | .093                                 | (.073) |
| Upper Management           | .177                       | (.121) | .160                                 | (.113) | .156                                 | (.109) |
| Intercept                  | 5.133***                   | (.281) | 3.757***                             | (.217) | 5.255                                | (.205) |
| N                          | 546                        |        | 1,752                                |        | 1,752                                |        |
| <i>F</i> -test             | 12.95***                   |        | 7.40***                              |        | 6.77***                              |        |

<sup>a</sup> Multiple-imputation estimates (m=25) using OLS regression are displayed. Entries are unstandardized regression coefficients (*b*) and robust standard errors (SE).

<sup>b</sup> Mean coefficients and standard errors across 1,000 Monte Carlo simulations where we assumed nonrespondents would have scored 1-2 SDs below the respondent group mean on our dependent variable. *Recently disrespected* was statistically significant 0 times, *citizen animus* 1,000 times, and *perceived crime trend* 712 times.

<sup>c</sup> Mean coefficients and standard errors across 1,000 Monte Carlo simulations where we assumed nonrespondents would have scored 1-2 SDs above the respondent group mean on our dependent variable. *Recently disrespected* was statistically significant 538 times, *citizen animus* 1,000 times, and *perceived crime trend* 21 times.

\* $p < .05$ ; \*\* $p < .01$ ; \*\*\* $p < .001$

**Table C2. Study 2: Comparison of Observed Results to Simulated Results wherein Nonrespondents Were Assumed to Have Differed Substantially from Respondents on Perceived Audience Legitimacy**

| Variable                        | Simulated Data             |        |                                      |        |                                      |        |
|---------------------------------|----------------------------|--------|--------------------------------------|--------|--------------------------------------|--------|
|                                 | Observed Data <sup>a</sup> |        | Negative Bias Threshold <sup>b</sup> |        | Positive Bias Threshold <sup>c</sup> |        |
|                                 | <i>b</i>                   | SE     | <i>b</i>                             | SE     | <i>b</i>                             | SE     |
| Citizen Animus                  | -.275***                   | (.057) | -.182***                             | (.031) | -.177***                             | (.030) |
| Hostile Local Media             | -.098*                     | (.049) | -.083**                              | (.026) | -.077***                             | (.023) |
| Hostile National Media          | .063                       | (.037) | .037                                 | (.024) | .032                                 | (.024) |
| Violent Crime Rate <sup>d</sup> | -.058*                     | (.025) | -.044*                               | (.018) | -.040*                               | (.018) |
| %Black <sup>d</sup>             | -.028                      | (.027) | -.024                                | (.020) | -.018                                | (.019) |
| %Hispanic <sup>d</sup>          | .024                       | (.037) | .018                                 | (.023) | .015                                 | (.024) |
| Change %Black <sup>d</sup>      | .125                       | (.106) | .036                                 | (.069) | .051                                 | (.066) |
| Change %Hispanic <sup>d</sup>   | -.107                      | (.093) | -.048                                | (.062) | -.059                                | (.069) |
| Chief                           | .185*                      | (.089) | .065                                 | (.042) | .072                                 | (.043) |
| Years of Experience             | .003                       | (.003) | .002                                 | (.002) | .001                                 | (.002) |
| Master's Degree                 | .063                       | (.050) | .017                                 | (.034) | .034                                 | (.032) |
| Large Agency                    | .095                       | (.066) | .204***                              | (.035) | -.092**                              | (.037) |
| White Male                      | -.072                      | (.062) | -.025                                | (.043) | -.016                                | (.041) |
| South (Reference)               | —                          |        | —                                    |        | —                                    |        |
| Northeast                       | -.148                      | (.093) | -.069                                | (.051) | -.094                                | (.053) |
| Midwest                         | -.072                      | (.077) | -.035                                | (.045) | -.060                                | (.044) |
| West                            | -.153                      | (.093) | -.032                                | (.061) | -.061                                | (.059) |
| Population Size <sup>d</sup>    | -.026                      | (.027) | -.068***                             | (.017) | .042**                               | (.016) |
| Unemployment Rate <sup>d</sup>  | -.074                      | (.062) | -.070                                | (.043) | -.050                                | (.044) |
| %Trump Voters                   | -.002                      | (.002) | .000                                 | (.001) | -.001                                | (.001) |
| Intercept                       | 5.279***                   | (.497) | 5.056***                             | (.326) | 4.796***                             | (.323) |
| N                               | 665                        |        | 2,496                                |        | 2,496                                |        |
| F-test                          | 5.48***                    |        | 6.76***                              |        | 4.32***                              |        |

<sup>a</sup> Multiple-imputation estimates (m=25) using OLS regression are displayed. Entries are unstandardized regression coefficients (b) and robust standard errors (SE).



---

<sup>b</sup> Mean coefficients and standard errors across 1,000 Monte Carlo simulations where we assumed nonrespondents would have scored 1-2 SDs below the respondent group mean on our dependent variable. *Citizen animus* was statistically significant 1,000 times, *local media* 1,000 times, *national media* 12 times, and *violent crime rate* 995 times. *%Black*, *%Hispanic*, *Change %Black*, and *Change %Hispanic* were not statistically significant in any of the simulated models.

<sup>c</sup> Mean coefficients and standard errors across 1,000 Monte Carlo simulations where we assumed nonrespondents would have scored 1-2 SDs above the respondent group mean on our dependent variable. *Citizen animus* was statistically significant 1,000 times, *local media* 1,000 times, *national media* 1 time, and *violent crime rate* 914 times. *%Black*, *%Hispanic*, *Change %Black*, and *Change %Hispanic* were not statistically significant in any of the simulated models.

<sup>d</sup> Natural log transformation.

\* $p < .05$ ; \*\* $p < .01$ ; \*\*\* $p < .001$

**Table C3. Study 2: Regression Models Predicting Procedural Justice, Distributive Justice, Lawfulness, and Effectiveness**

**(N = 665)**

| Variable                        | Procedural Justice |      | Distributive Justice |      | Lawfulness |      | Effectiveness <sup>b</sup> |      |
|---------------------------------|--------------------|------|----------------------|------|------------|------|----------------------------|------|
|                                 | <i>b</i>           | SE   | <i>b</i>             | SE   | <i>b</i>   | SE   | <i>b</i>                   | SE   |
| Citizen Animus                  | -.268***           | .065 | -.341***             | .071 | -.270***   | .073 | -.924*                     | .387 |
| Hostile Local Media             | -.091              | .057 | -.127*               | .058 | -.097      | .059 | -.329                      | .317 |
| Hostile National Media          | .025               | .047 | .162**               | .049 | .039       | .054 | -.189                      | .222 |
| Violent Crime Rate <sup>a</sup> | -.055              | .038 | -.035                | .037 | -.082*     | .037 | -.254                      | .169 |
| %Black <sup>a</sup>             | -.020              | .034 | -.004                | .035 | -.076      | .040 | -.395*                     | .191 |
| %Hispanic <sup>a</sup>          | .055               | .045 | .049                 | .057 | -.003      | .041 | -.123                      | .230 |
| Change %Black <sup>a</sup>      | .192               | .123 | .063                 | .135 | .101       | .125 | .488                       | .582 |
| Change %Hispanic <sup>a</sup>   | -.220*             | .100 | -.084                | .142 | -.122      | .123 | -.012                      | .623 |
| Chief                           | .202               | .107 | .176                 | .111 | .172       | .132 | .581                       | .623 |
| Years of Experience             | .000               | .004 | .006                 | .004 | .005       | .005 | .014                       | .022 |
| Master's Degree                 | .009               | .061 | .097                 | .062 | .094       | .070 | -.022                      | .318 |
| Large Agency                    | .193*              | .081 | .049                 | .096 | .075       | .087 | .230                       | .424 |
| White Male                      | .036               | .093 | -.089                | .085 | -.140      | .087 | -1.027**                   | .343 |
| South (Reference)               | —                  |      | —                    |      | —          |      | —                          |      |
| Northeast                       | -.155              | .115 | -.132                | .125 | -.204      | .123 | -1.256*                    | .508 |
| Midwest                         | -.034              | .089 | -.073                | .109 | -.154      | .107 | -.976*                     | .470 |
| West                            | -.164              | .104 | -.060                | .116 | -.276      | .145 | -1.304*                    | .588 |
| Population size <sup>a</sup>    | -.071*             | .030 | -.037                | .038 | .004       | .035 | -.086                      | .195 |
| Unemployment Rate <sup>a</sup>  | -.019              | .076 | -.156                | .087 | -.007      | .084 | -.170                      | .348 |
| %Trump Voters                   | -.001              | .002 | -.002                | .003 | -.004      | .003 | -.011                      | .012 |
| Intercept                       | 5.541***           | .606 | 5.050***             | .641 | 5.651***   | .666 | —                          |      |
| <i>F</i> -test                  | 4.15***            |      | 7.48***              |      | 4.09***    |      | 2.98***                    |      |
| Adjusted R <sup>2</sup>         | .214               |      | .266                 |      | .233       |      | —                          |      |

NOTES: Multiple-imputation estimates (m=25) using OLS regression are displayed unless otherwise noted. Entries are unstandardized regression coefficients (b) and robust standard errors (SE).

<sup>a</sup> Natural log transformation; <sup>b</sup> Ordered logistic regression; \* $p < .05$ ; \*\* $p < .01$ ; \*\*\* $p < .001$
